# Supplementary material
Source: MDPI journal article supplement (https://www.mdpi.com/2673-7426/1/1/2)

**Figure S1.** Interface and browsing the patient records

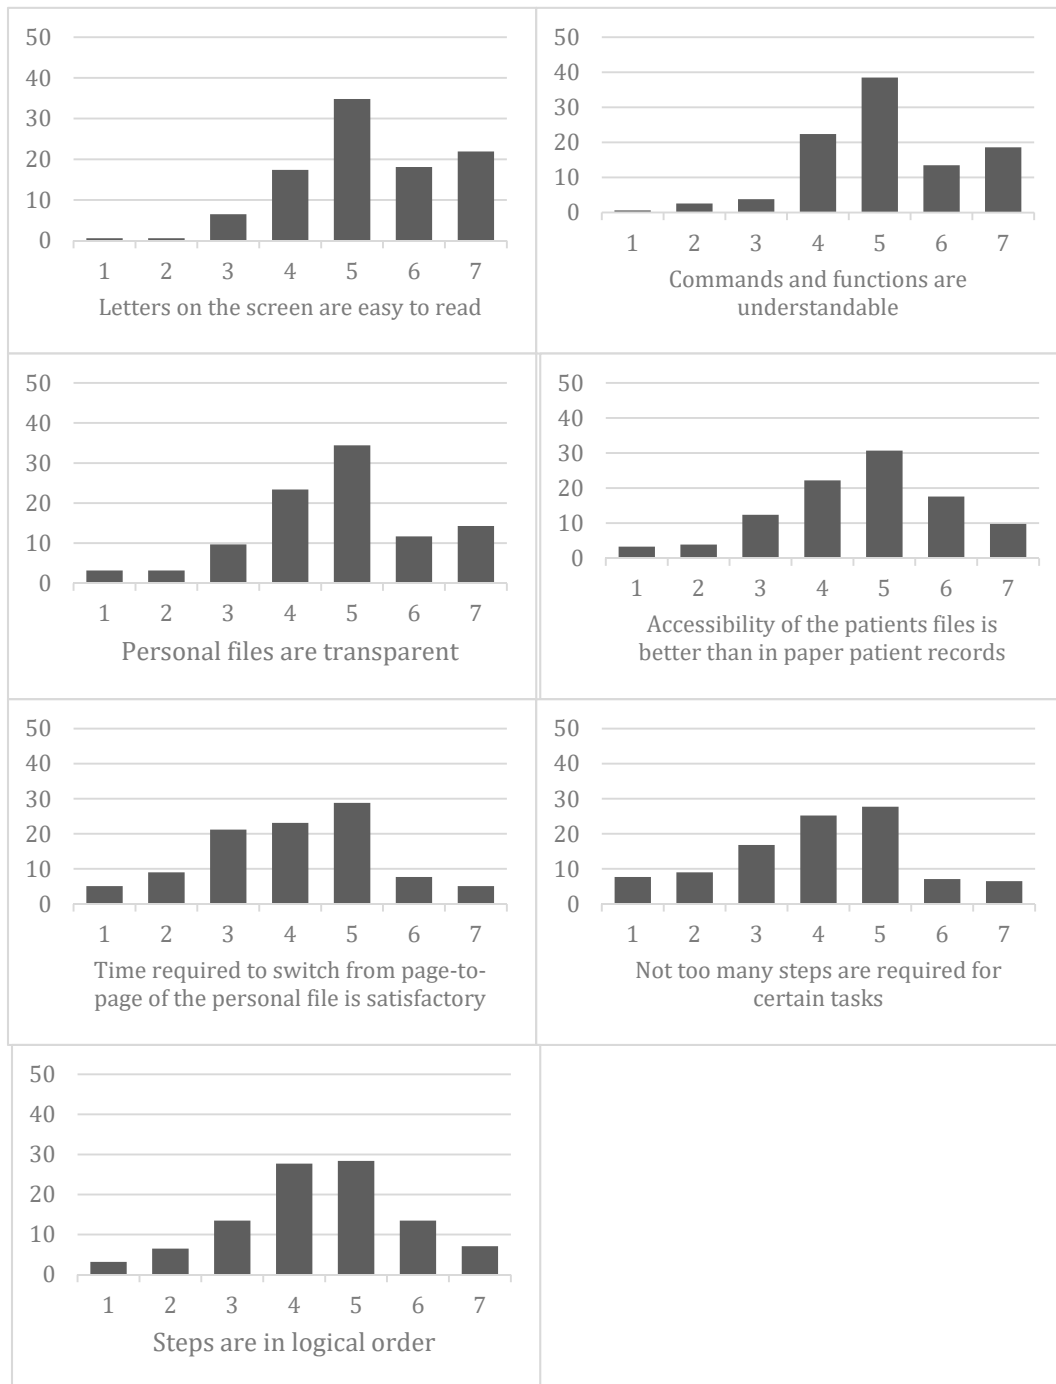

**Figure S2. Terminology**

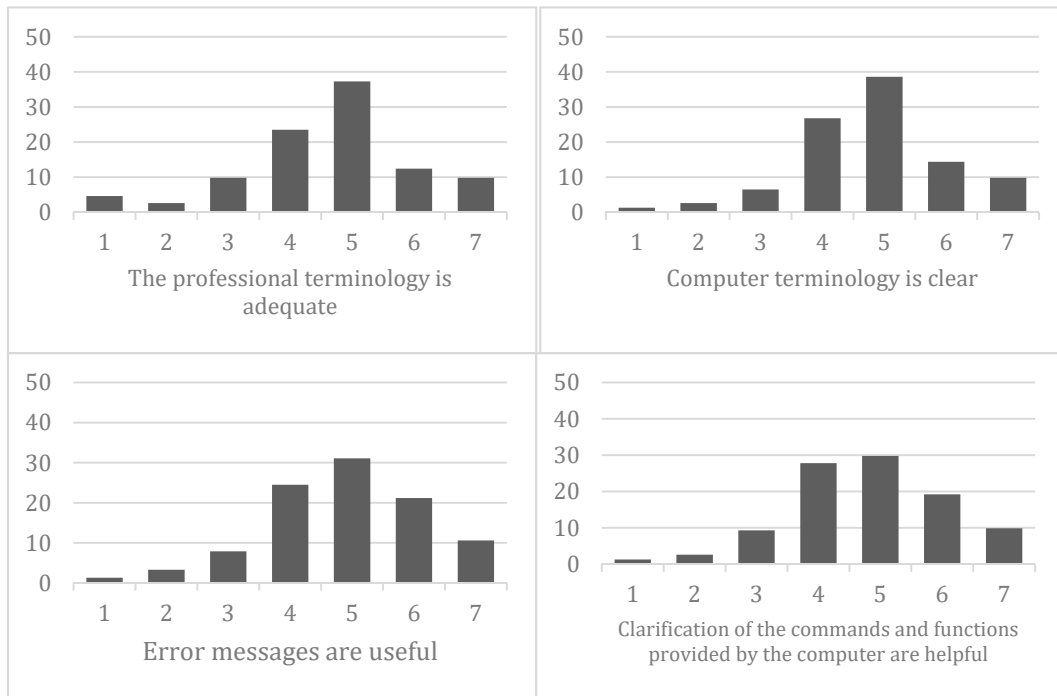

**Figure S3. EHR capability**

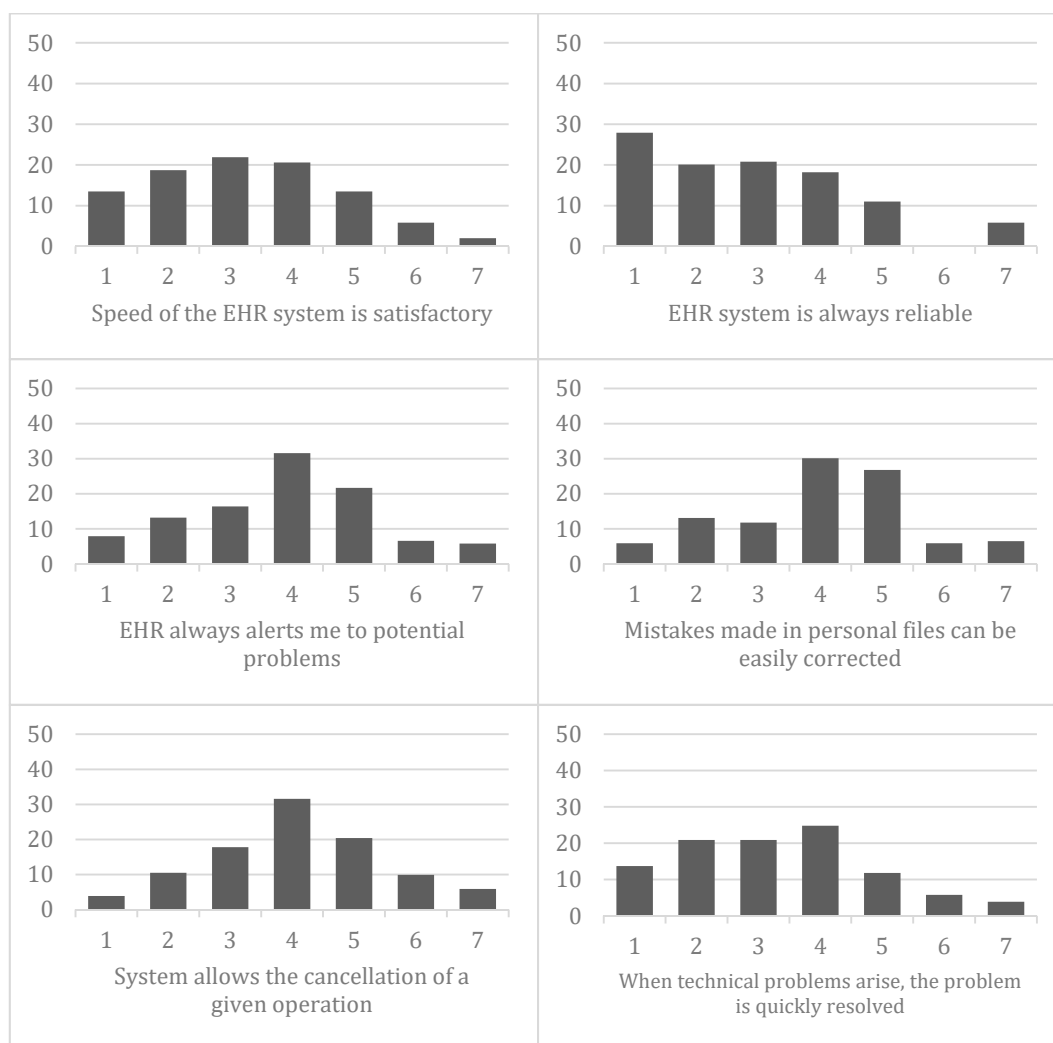

Figure S4. Ease of use

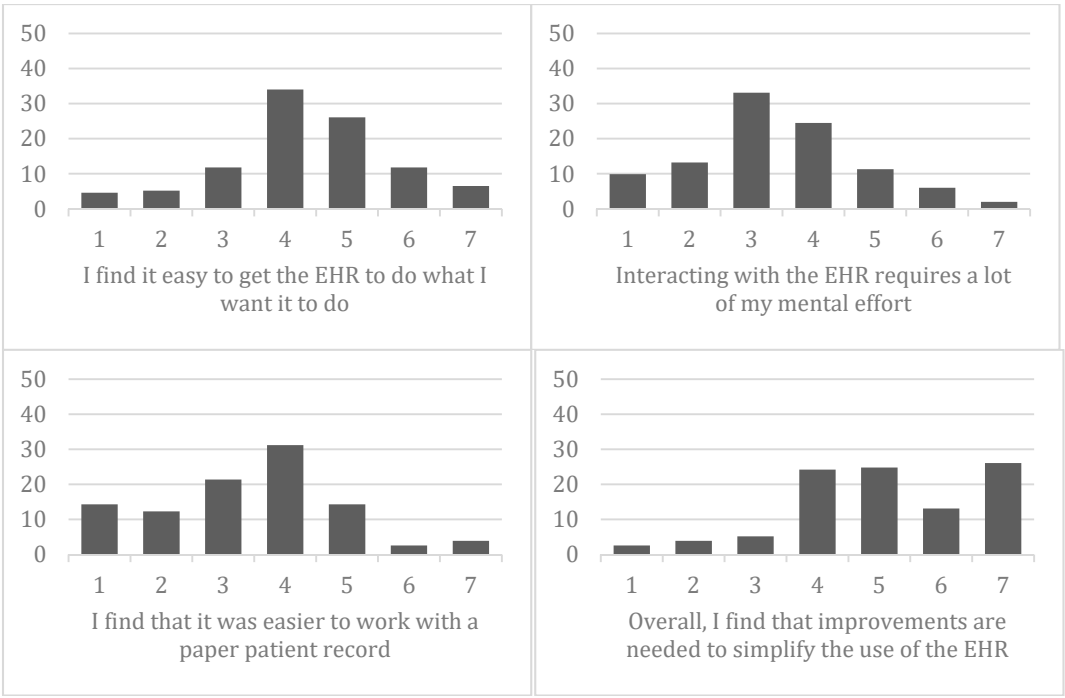

**Figure S5. EHR usefulness**

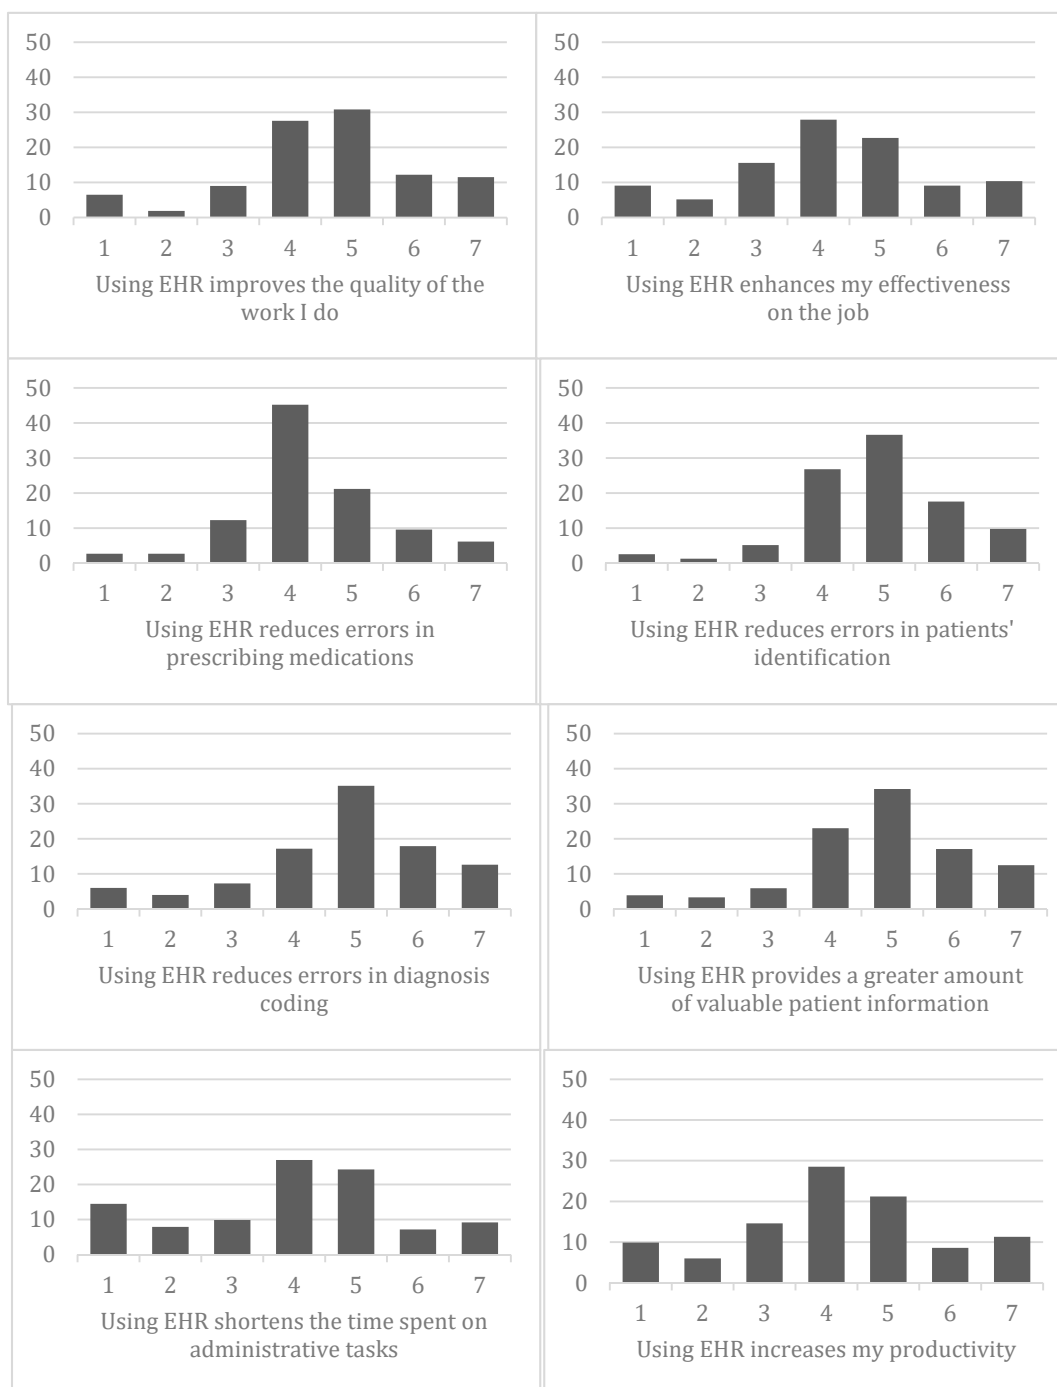

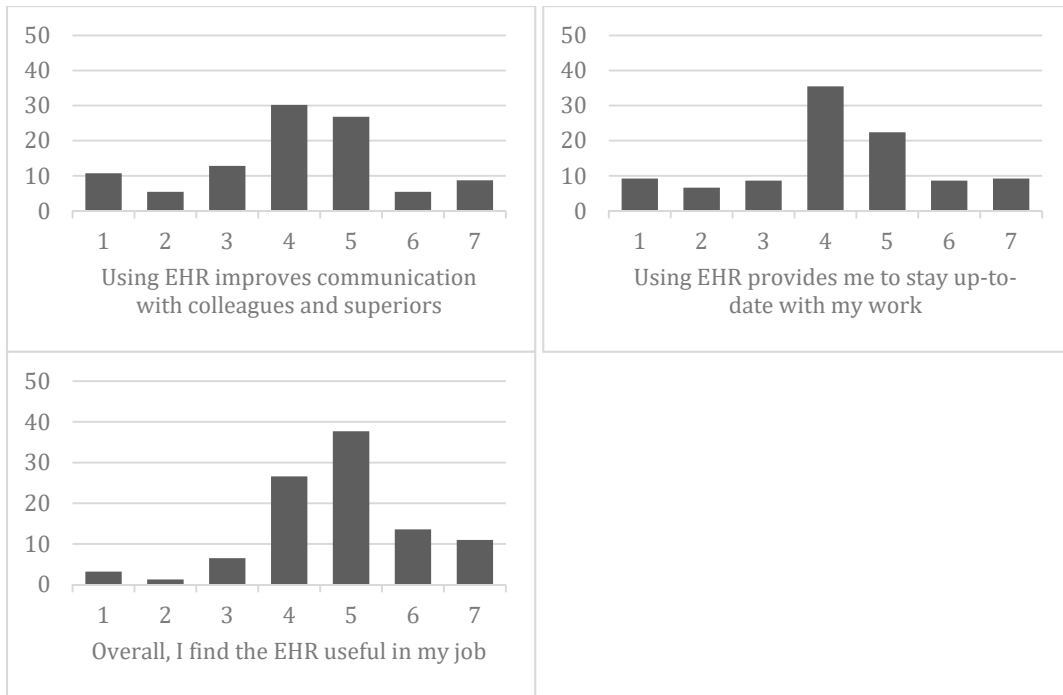

Figure S6. Attitudes towards using the EHR

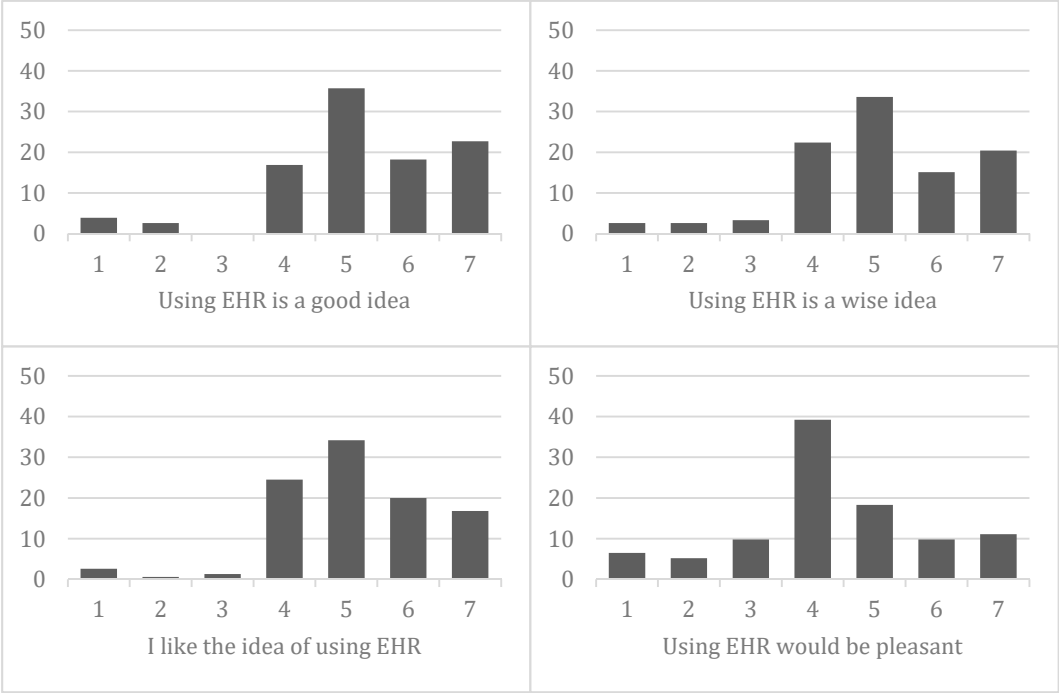

Supplement: s1 [file s1]
